# Supplementary material
Source: PubMed Central journal article supplement (PMC2435186)
Supplement: NIHMS49365-supplement-supplement.pdf [file NIHMS49365-supplement-supplement.pdf]

### **Supplementary Data**

**Figure S1. Global gene expression analyses of re-programmed 3T3/D3 cells.** (A) Heat map of z-scored values for 3286 genes showing significant differences ( $p < 0.001$  and absolute log fold change of  $> 1$ ) between 3T3 and 3T3/D3 cells and the expression level of same genes in D3 cells. (B) Heat map of z-scored 99 genes down-regulated in 3T3 cells and up-regulated in D3 and 3T3/D3 cells. A partial list of up regulated or down regulated genes common to 3T3/D3 and D3 cells is shown in table 1 of the main text. (C) 3,286 genes found to be differentially expressed between 3T3 and 3T3/D3 cell types were categorized with respect to functional groups as per the software EASE (<http://david.niaid.nih.gov/david/ease.htm>). These functional groups include the modulation in the expression of genes involved in chromatin remodeling and methyltransferase activities.

**Figure S2: 3T3/D3 cells acquire Cardiomyocyte and endothelial cell morphology.** Phase contrast images showing cardiomyocyte and endothelial cell-like morphology of 3T3/D3 cells when cultured under conditions conducive to CMC or EC differentiation, in vitro.

**Figure S3: Neuronal and adipogenic differentiation of 3T3/D3 cells.**

Cells were cultured under neuronal and adipogenic differentiation conditions (*see methods in main text*) and the expression of neuronal markers (A) and adipocyte marker (B) were assessed by immunocytochemical staining. Representative images are shown.

**Figure S4: Endothelial and smooth muscle differentiation of 3T3/D3 cells transplanted in the ischemic hind limb.** Tissue sections from ischemic hind limbs transplanted with 3T3/D3 or 3T3/3T3 cells were analyzed for EC and skeletal muscle differentiation of transplanted cells. Fluorescent microscopy was conducted to visualize co-localization of CD31<sup>+</sup> (green) and DiI<sup>+</sup> (red) cells and alpha-SMA<sup>+</sup> (green) and DiI<sup>+</sup> (red) cells to determine EC and muscle differentiation, respectively and images in the same visual field were merged to generate composite images. As shown in **Fig. S4A** many CD31<sup>+</sup>DiI<sup>+</sup> double positive cells (indicated by yellow fluorescence) were observed in the ischemic tissue of mice treated with 3T3/D3 cells compared to those treated with 3T3/3T3 cells. Similarly, a large number of 3T3/D3 cells co-expressed muscle marker,  $\alpha$ -SMA, in the ischemic hind limbs while very few  $\alpha$ -SMA +DiI double positive cells in 3T3/3T3 treated mice were observed (**Fig. S4B**). Similar patterns were observed when tissue sections were stained with additional EC and muscle cell markers (Isolectin B4 and desmin; data not shown).

**Figure S5. Transplanted 3T3/D3 cells proliferate in the ischemic myocardium.** We determined the number of proliferating GFP<sup>+</sup> transplanted cells in the infarcted myocardium 28 days following AMI and cell transplantation. A higher number of proliferating cells, (nuclei stained positive for Ki67 (red) were also observed in the myocardial sections from 3T3/D3 (yellow fluorescence) treated mice as compared to 3T3/3T3 cell treated mice ( $p < 0.05$ ).

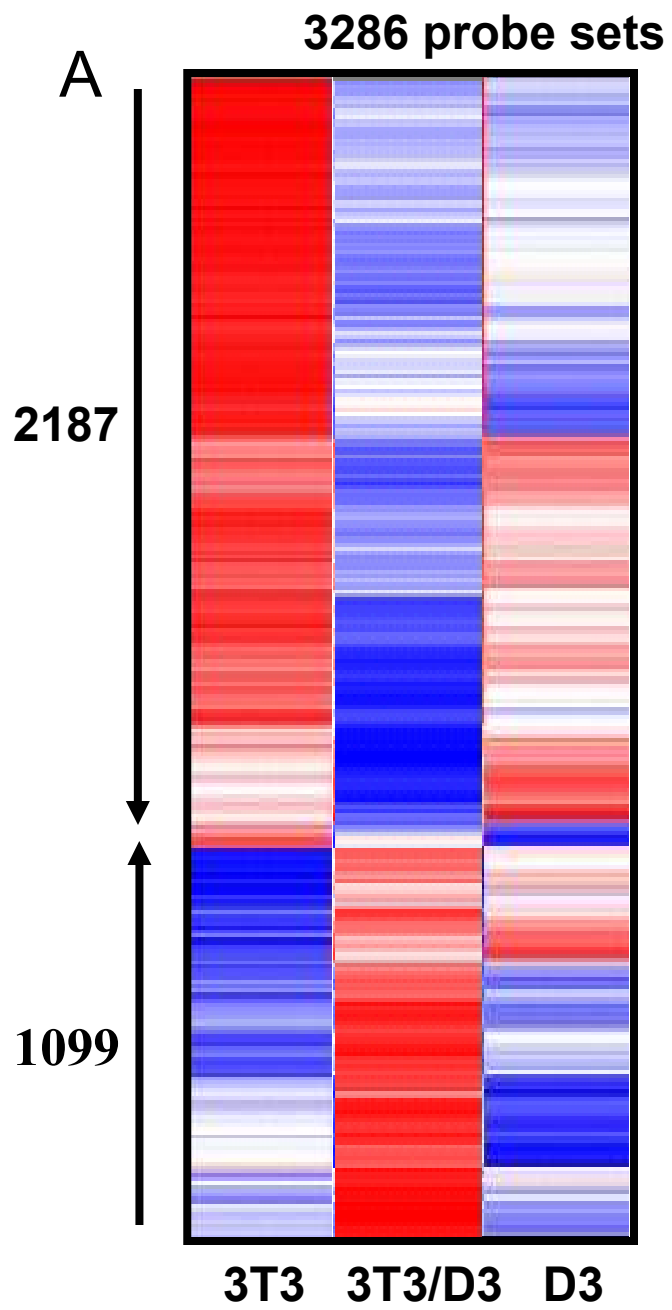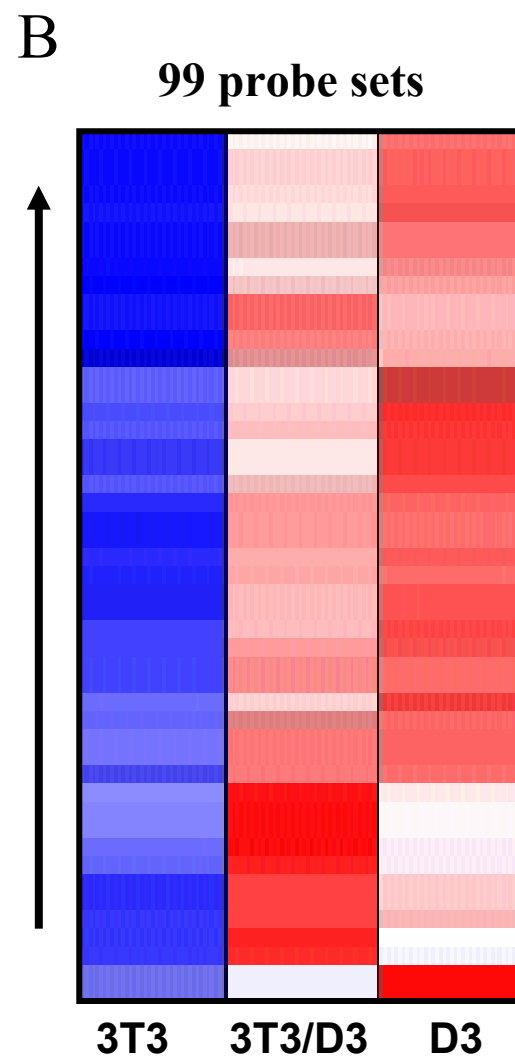

Figure S1

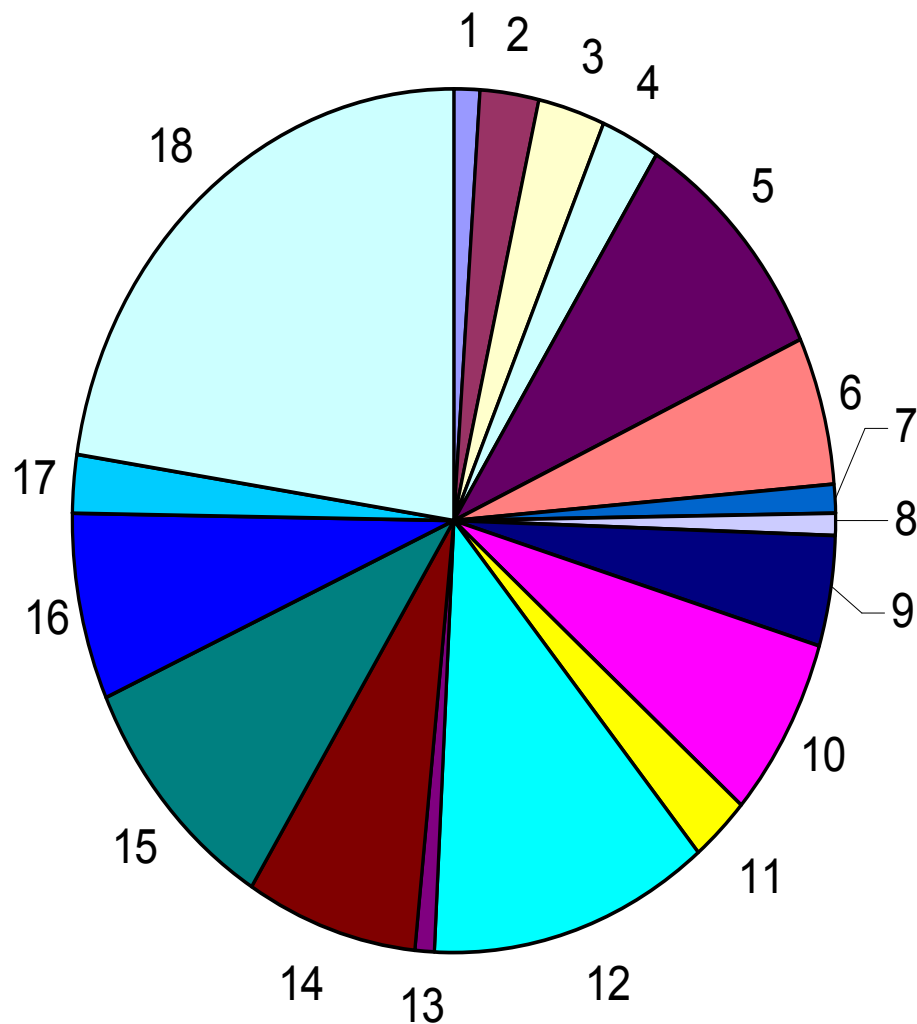

- 1=Apoptosis (1%)**
- 2=Catalytic activity (2.5%)**
- 3=Cell cycle (3%)**
- 4=Cell differentiation (2.5%)**
- 5=Cell growth (9%)**
- 6=Cell proliferation (5.5%)**
- 7=Chromatin (1.2%)**
- 8=Cytoskeleton (0.8%)**
- 9=Development (4.3%)**
- 10=Intracellular (6.7%)**
- 11=Kinase activity (2.5%)**
- 12=Metabolism (11.8%)**
- 13=Methyltransferase (0.9%)**
- 14=Transcription (7.1%)**
- 15=Physiol. process (9.6%)**
- 16=Signal transduction (7%)**
- 17=Protein modification (2%)**
- 18=Other/unknown (22.6%)**

Figure S1C

3T3/3T3

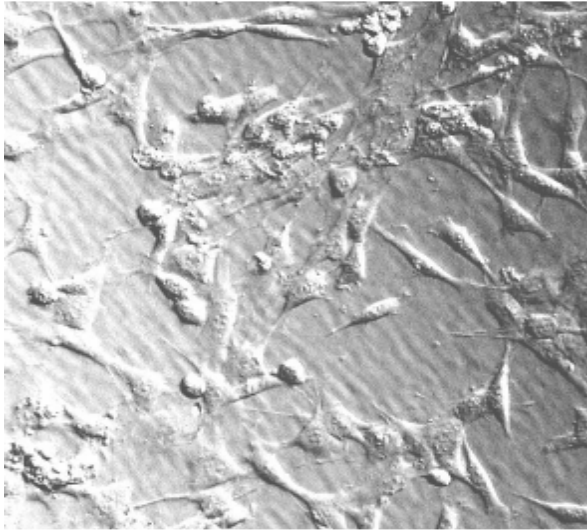

3T3/D3

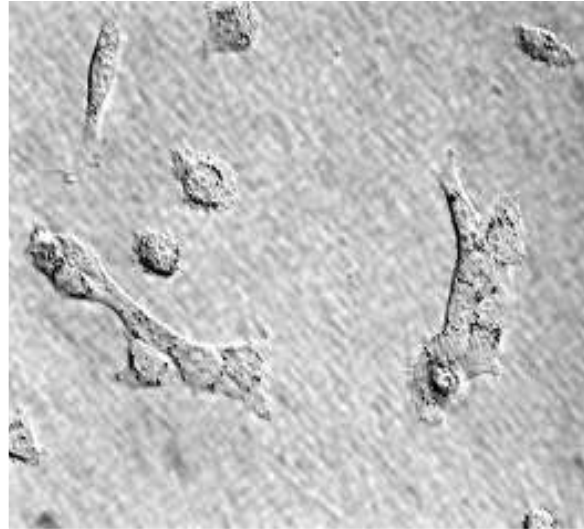

Cardiomyocyte  
Differentiation

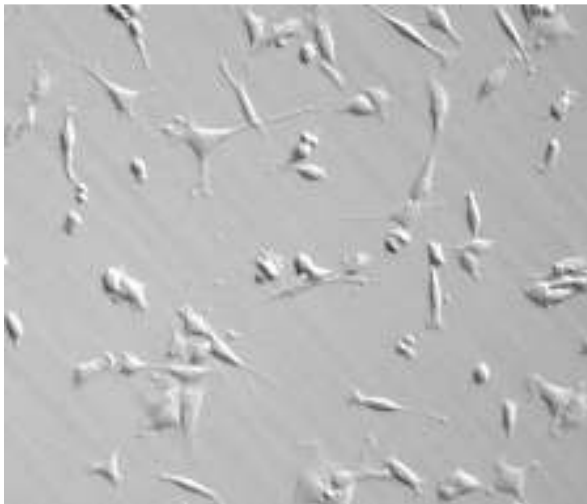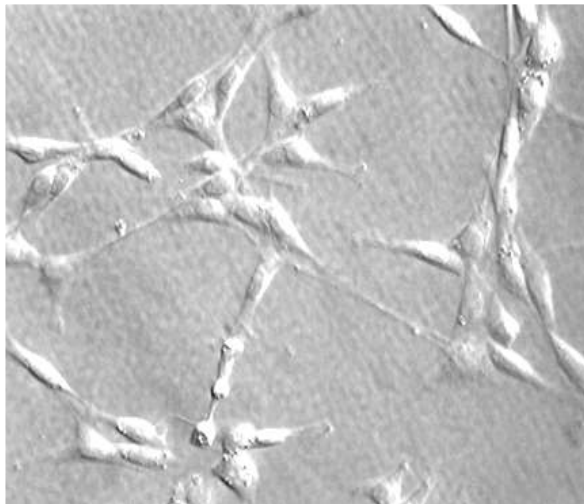

Endothelial Cell  
Differentiation

Figure S2

**3T3/3T3**

**3T3/D3**

**A**

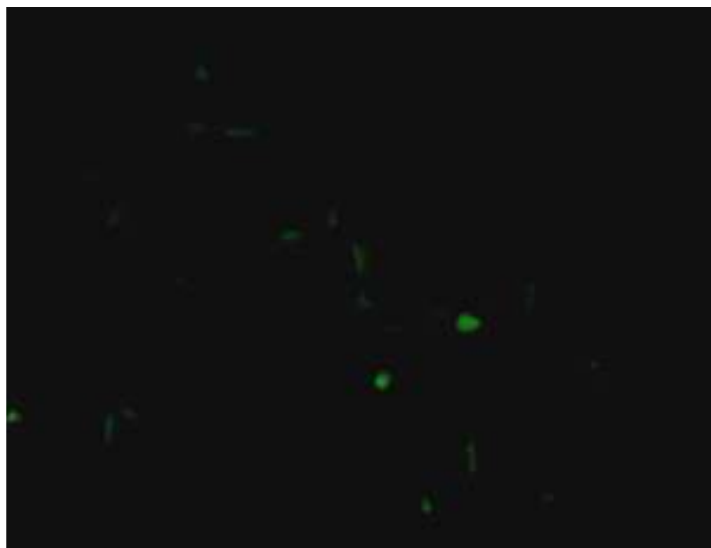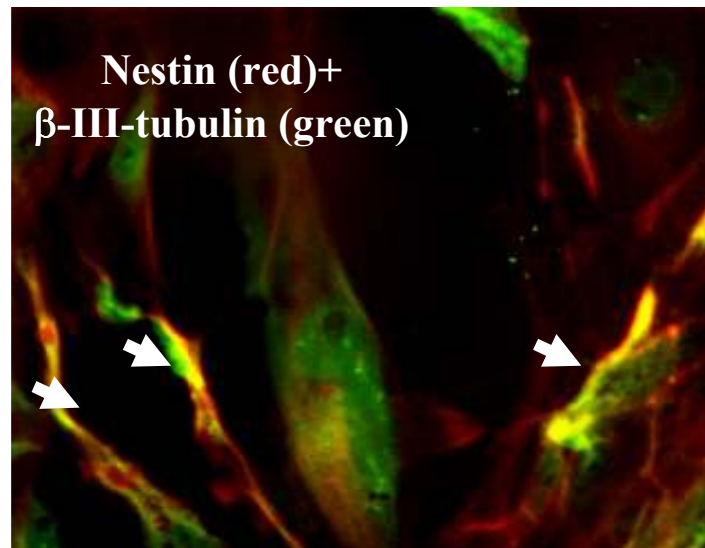

**Neuronal**

**B**

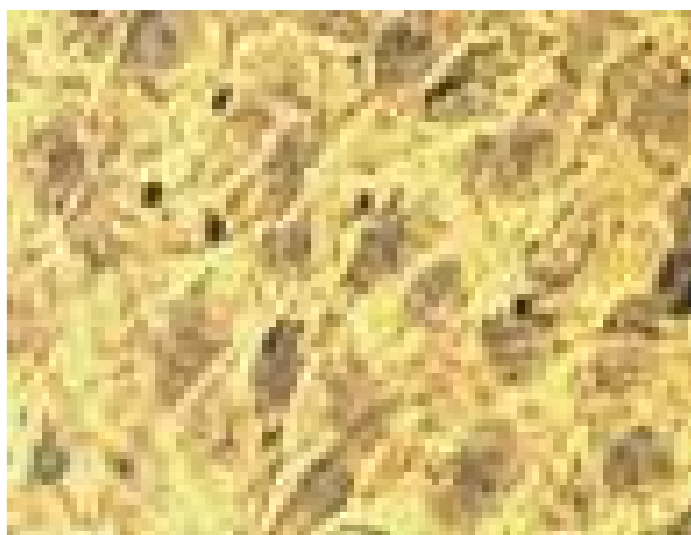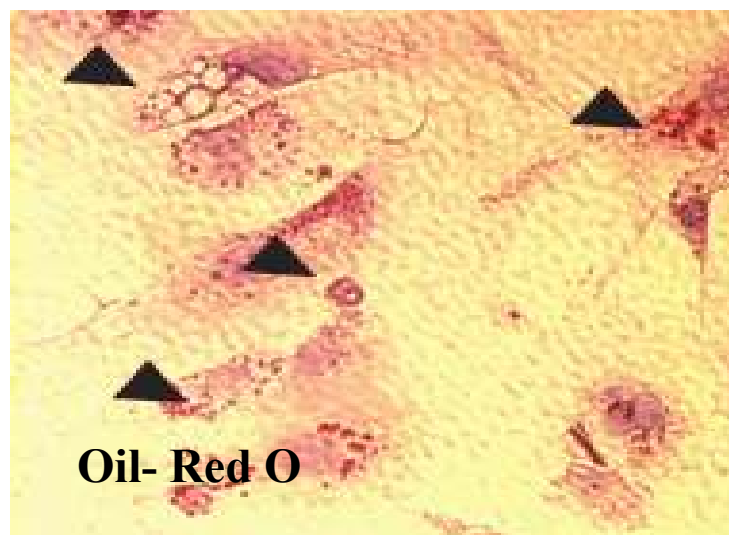

**Adipocyte**

**Figure S3**

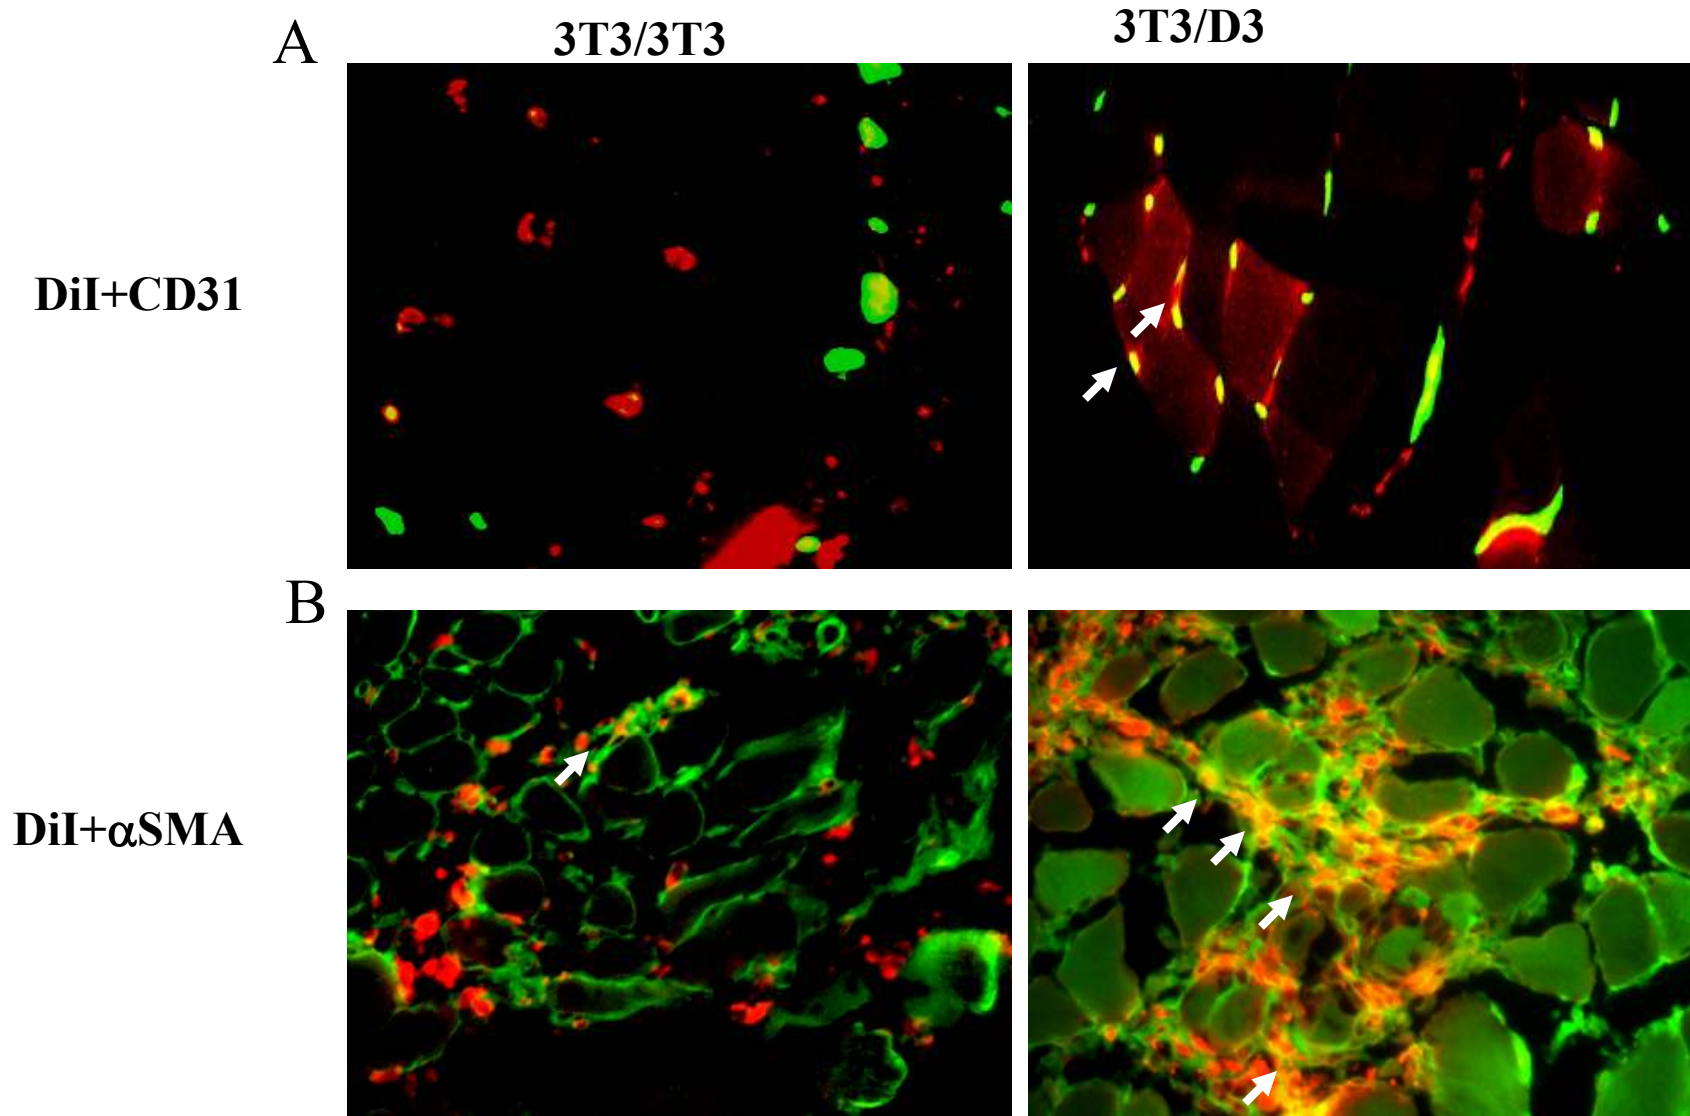

Figure S4

3T3/3T3

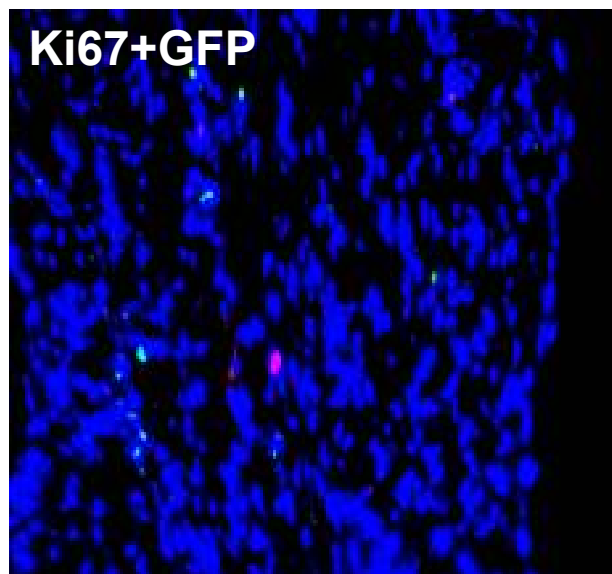

3T3/D3

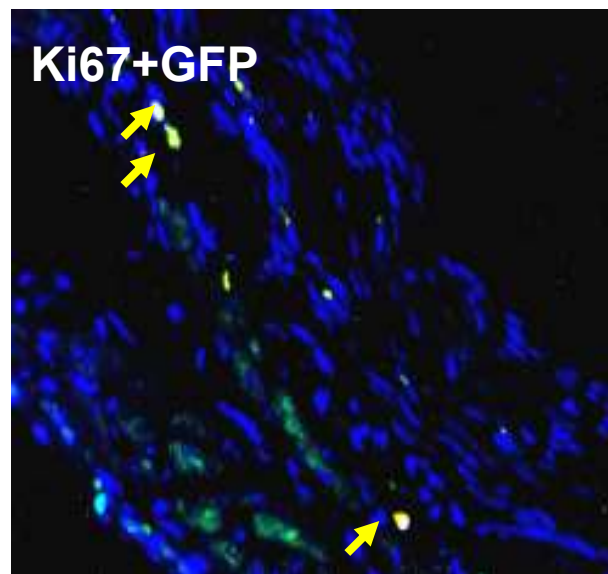

Figure S5
